# Supplementary material for: Technical note: Diagnostic efficiency – specific evaluation of modelperformance
Source: Copernicus journal article supplement (doi:10.5194/hess-2020-237), 2020-06-12
Supplement: Supplementary file 1 [file hess-2020-237-supplement.pdf]

## Supplement of

# Technical note: Diagnostic efficiency – specific evaluation of model performance

Robin Schwemmler et al.

5 Correspondence to: Robin Schwemmler (robin.schwemmler@hydrology.uni-freiburg.de)

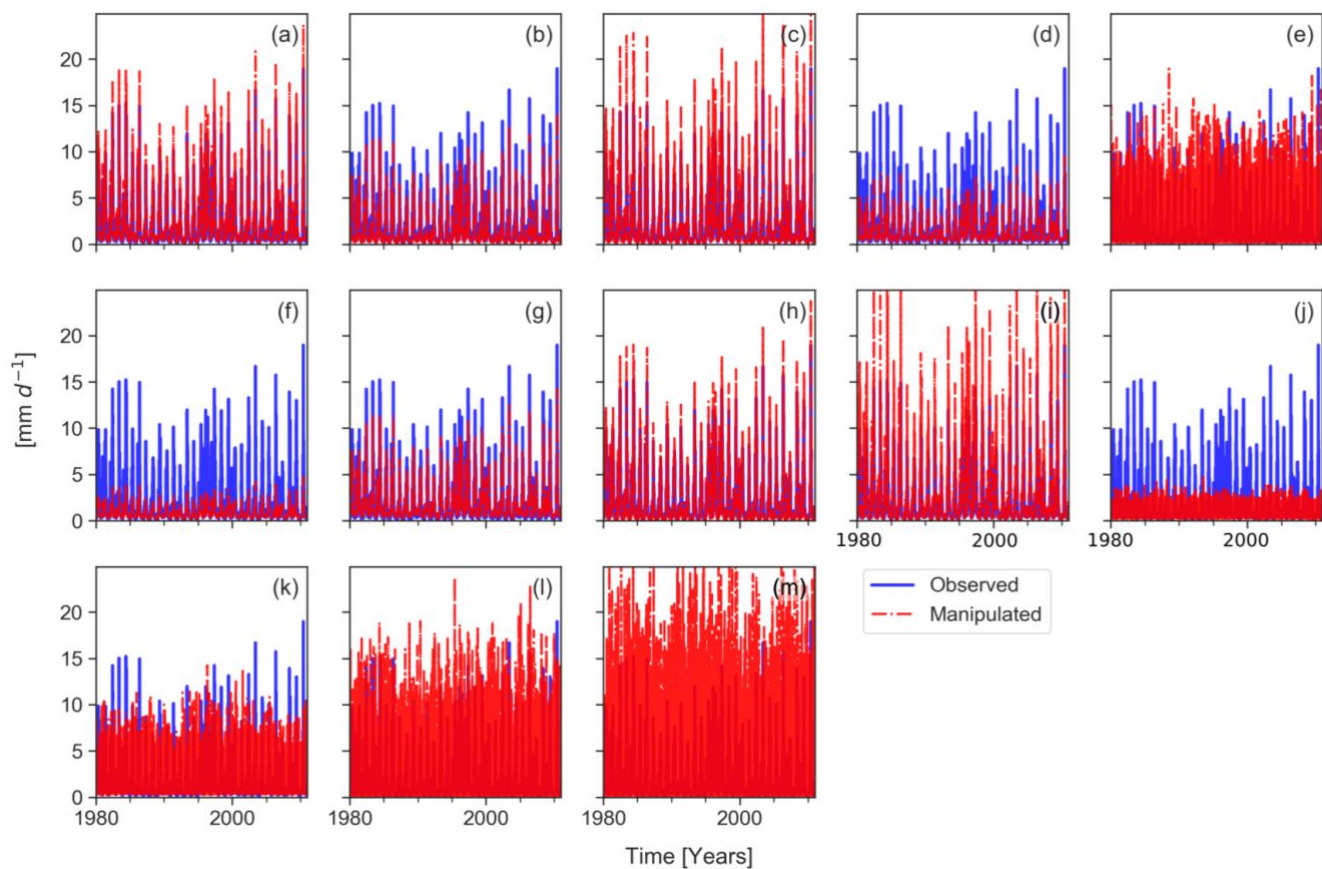

Figure S1: Observed streamflow time series and manipulated streamflow time series generated by mimicking constant errors, dynamic errors and timing errors (a-m)

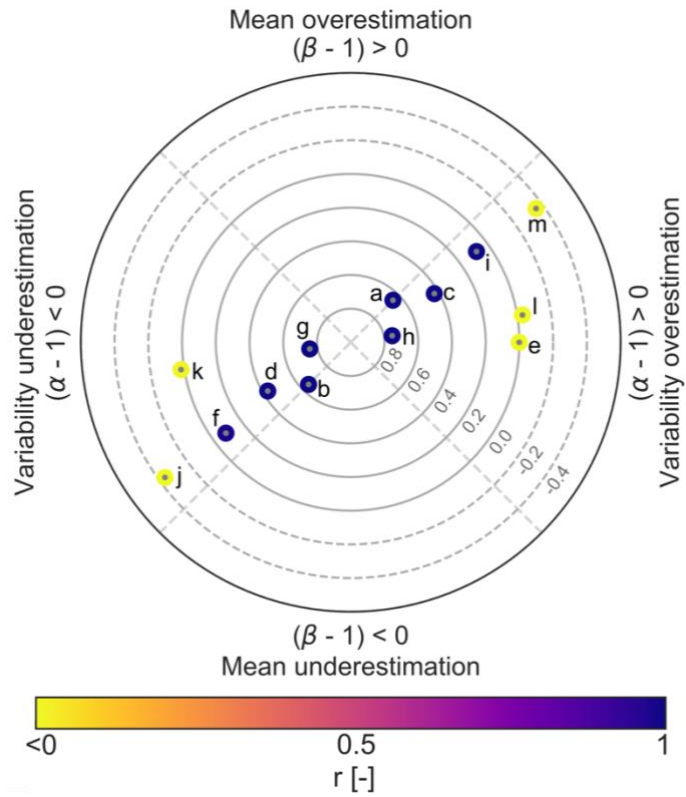

10 **Figure S2:** Polar plot of *KGE* for manipulated time series generated by mimicking constant errors, dynamic errors and timing errors (a-m)

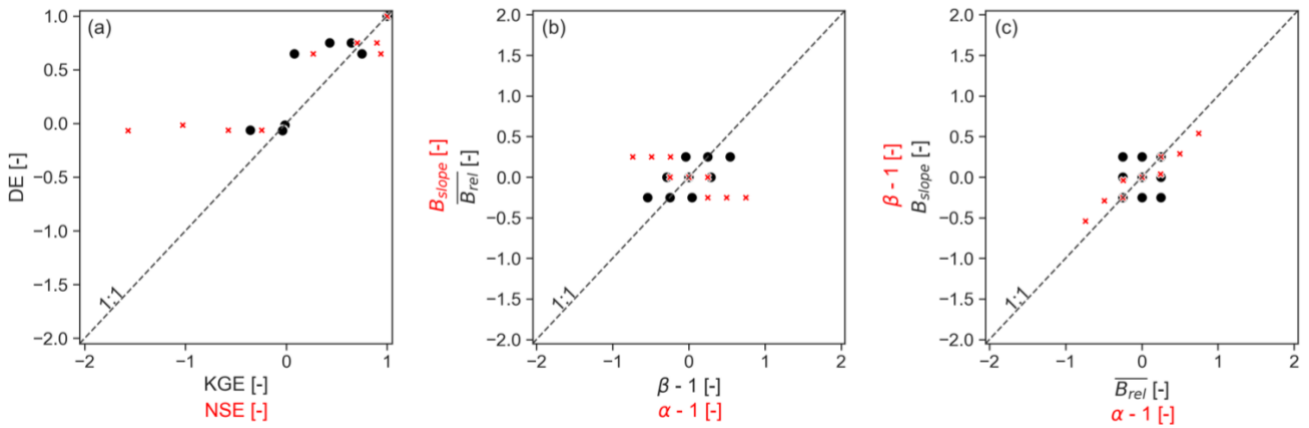

15 **Figure S3:** (a) Scatterplot to compare *DE* with *KGE* (black) and *DE* with *NSE* (red), respectively. (b) Scatterplot to compare  $\overline{B_{rel}}$  with  $\beta$  (black) and  $B_{slope}$  with  $\alpha$  (red), respectively. (c) Scatterplot to compare  $\overline{B_{rel}}$  with  $B_{slope}$  (black) and  $\beta$  with  $\alpha$  (red), respectively. Metrics are calculated for manipulated time series (see Fig. S1)

**Table S1: Comparison of  $DE$  metric terms and  $KGE$  metric terms for manipulated time series generated by mimicking constant errors, dynamic errors and timing errors (a-m)**

|                      | a    | b     | c     | d     | e | f     | g     | h     | i     | j     | k     | l     | m     |
|----------------------|------|-------|-------|-------|---|-------|-------|-------|-------|-------|-------|-------|-------|
| $\overline{B_{rel}}$ | 0.25 | -0.25 | 0     | 0     | 0 | -0.25 | 0.25  | -0.25 | 0.25  | -0.25 | 0.25  | -0.25 | 0.25  |
| $ B_{area} $         | 0    | 0     | 0.25  | 0.25  | 0 | 0.25  | 0.25  | 0.25  | 0.25  | 0.25  | 0.25  | 0.25  | 0.25  |
| $r$                  | 1    | 1     | 1     | 1     | 0 | 0.98  | 1     | 1     | 1     | 0     | 0     | 0     | 0     |
| $B_{dir}$            | 0    | 0     | 0.12  | -0.12 | 0 | -0.12 | -0.12 | 0.12  | 0.12  | -0.12 | -0.12 | 0.12  | 0.12  |
| $B_{slope}$          | 0    | 0     | -0.25 | 0.25  | 0 | 0.25  | 0.25  | -0.25 | -0.25 | 0.25  | 0.25  | -0.25 | -0.25 |
| $\beta$              | 1.25 | 0.75  | 1.29  | 0.71  | 1 | 0.46  | 0.96  | 1.04  | 1.54  | 0.46  | 0.96  | 1.04  | 1.54  |
| $\alpha$             | 1.25 | 0.75  | 1.49  | 0.51  | 1 | 0.25  | 0.76  | 1.24  | 1.75  | 0.25  | 0.76  | 1.24  | 1.75  |

**Table S2: Comparison of  $DE$ ,  $KGE$  and  $NSE$  for modelling example. Simulations were realised with different parameter sets (set\_id).**

| set_id | $\overline{B_{rel}}$ | $ B_{area} $ | $r$  | $B_{dir}$ | $B_{slope}$ | $DE$ | $\beta$ | $\alpha$ | $KGE$ | $NSE$ |
|--------|----------------------|--------------|------|-----------|-------------|------|---------|----------|-------|-------|
| 05     | 0.16                 | 0.32         | 0.88 | -0.15     | 0.32        | 0.62 | 0.90    | 0.79     | 0.74  | 0.77  |
| 48     | 0.16                 | 0.34         | 0.89 | -0.16     | 0.34        | 0.61 | 0.89    | 0.79     | 0.74  | 0.77  |
| 94     | 0.11                 | 0.28         | 0.89 | -0.13     | 0.28        | 0.68 | 0.90    | 0.83     | 0.77  | 0.78  |

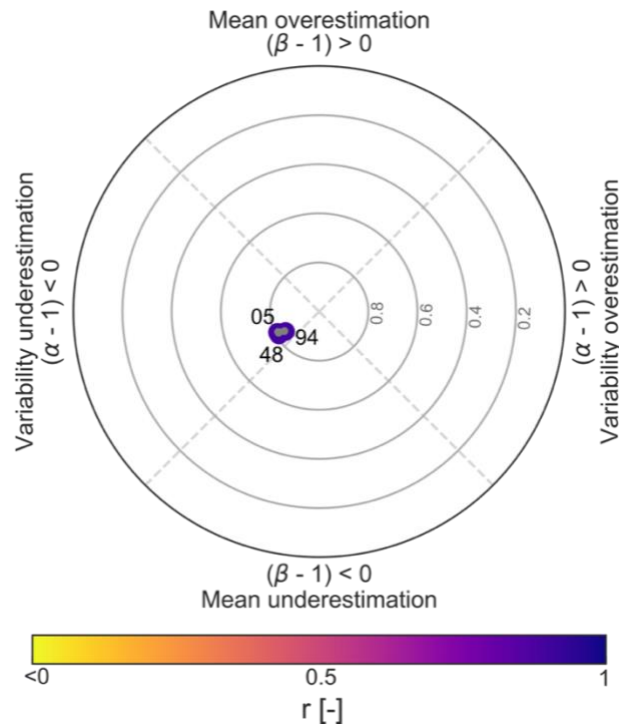

20 **Figure S4: Polar plot of  $KGE$  for modelling example. Simulations were realised with three different parameter sets (05, 48, 94; see Fig. 4).**
